# Supplementary material
Source: publisher figshare collection journal article supplement (https://karger.figshare.com/ndownloader/files/36428457)
Supplement: Supplementary file 1 [file 36428457]

**Supplement S11: Categorial confounding factors on right ventricular stroke volume bias**

|  | n | mean bias  (EC-TTE)  (m) | standard deviation  (SD) | limits of agreement  (m ± 1.96*SD) | p-value |
| --- | --- | --- | --- | --- | --- |
| Gestational age category |  |  |  |  | .628 |
| < 28 weeks | 14 | -0.17 | (0.49) | -1.12 to 0.78 |  |
| ≥ 28 weeks | 20 | -0.03 | (0.73) | -1.45 to 1.40 |  |
| Birthweight category |  |  |  |  | .239 |
| ≤ 1000g | 15 | -0.27 | (0.44) | -1.14 to 0.60 |  |
| > 1000g | 19 | 0.06 | (0.74) | -1.38 to 1.50 |  |
| Postnatal age category |  |  |  |  | .947 |
| Day 1 | 17 | -0.01 | (0.62) | -1.24 to 1.21 |  |
| Day 2 | 17 | -0.12 | (0.64) | -1.38 to 1.13 |  |
| Presence of PDA |  |  |  |  | .933 |
| No | 8 | -0.27 | (0.56) | -1.36 to 0.82 |  |
| Yes | 26 | -0.06 | (0.68) | -1.39 to 1.26 |  |
| Presence of hsPDA |  |  |  |  | .544 |
| No | 28 | -0.10 | (0.68) | -1.43 to 1.23 |  |
| Yes | 6 | -0.16 | (0.33) | -0.80 to 0.47 |  |
| Respiratory support during measurement |  |  |  |  | .199 |
|  |  |  |  |  |
| IPPV | 11 | -0.23 | (0.48) | -1.18 to 0.71 |  |
| CPAP/HFNC | 16 | 0.03 | (0.74) | -1.41 to 1.47 |  |
| None | 7 | -0.38 | (0.60) | -1.57 to 0.80 |  |

n, mean (standard deviation), limits of agreement of right ventricular (RV) stroke volume (SV), PDA patent ductus arteriosus (hs hemodynamic significant), IPPV invasive intermittent positive pressure ventilation, non-invasive respiratory support with continuous positive airway pressure (CPAP) or high flow nasal canula (HFNC)
